# Supplementary material for: Primary care interventions to address physical frailty among community-dwelling adults aged 60 years or older: A meta-analysis
Source: PLoS One. 2020 Feb 7;15(2):e0228821. doi: 10.1371/journal.pone.0228821 (PMC7006935; doi:10.1371/journal.pone.0228821)
Supplement: S3 Table — Showing intervention type, study identifier, and outcome measures used in the studies included in the meta-analysis. (XLSX) [file pone.0228821.s003.xlsx]

## Sheet: Matrix of outcome measures
		Outcome measurements
Intervention type	Study	Fried criteria	SPPB or physical performance test	Timed up and go test	Knee extension torque / knee strength	Gait speed	Grip strength	One leg stance	Functional reach	Chair stand
Exercise and nutrition supplements	Kim et al. 2015 (Exercise + nutrition)	1		1	1	1	1
	Ng et al. 2015 (Exercise + nutrition)	1			1	1
Exercise and nutrition education	Chan et al. 2017	ND		1			1	1
	Chan et al. 2012	ND			1			1
	Kwon et al. 2015 (Exercise + nutr. ed)					1	1	1
	Luger et al. 2016	1
	Seino et al. 2017	1		1		1	1	1
	Serra-Prat et al. 2017	1		1			1
	Tarazona-Santabalbina et al. 2016	1	1
Exercise only	Akihiro et al. 2018			1		1	ND	1	1
	Binder et al. 2002		1		1
	Brown et al. 2000		1		1	1		1	1
	Cesari et al. 2015	1				1	1
	Chen et al. 2019	1				1	1
	Clegg et al. 2014			1
	Coelho Junior et al. 2019			1	1	1	1	1
	Daniel 2012			1						1
	Fairhall et al. 2012					1
	Kim et al. 2015 (Exercise only)	1		1	1	1	1
	Kwon et al. 2015					ND	1	1
	Liu et al. 2017			1		1	1		1	1
	Nagai et al. 2018	1		1	1	1	1
	Ng et al. 2015 (Exercise only)	1			1	1
	Oh et al. 2017		1		1	1				1
	Wolf et al. 1996						1
	Yoon et al. 2018	ND	1	1	1	1	1
Nutrition only	Kim and Lee 2013		1	1		1	1
	Kim et al. 2015 (Nutrition only)			1	1	1	1
	Ng et al. 2015 (Nutrition only)				1	1
	Yamada et al. 2012			1	1		1		1	1
Comprehensive geriatric assessment	Behm et al. 2016	1
	Li et al. 2010	1
	Mazya et al. 2018	1
Hormone supplementation	Hildreth				1		1
	Jacobsen						1
	Muller		1		1		1
*ND= No primary data available
